# Supplementary material
Source: Frontiers journal article supplement (https://www.frontiersin.org/articles/353462)
Supplement: Data_Sheet_1.pdf [file Data_Sheet_1.pdf]

## *Supplementary Material*

# **Advancing stem cell models of alpha-synuclein gene regulation in neurodegenerative disease**

**Desiree A. Piper, Danuta Sastre, Birgitt Schüle\***

Parkinson's Institute and Clinical Center, Sunnyvale, CA, U.S.A.

\* **Correspondence:** Birgitt Schüle, [bschuele@thepi.org](mailto:bschuele@thepi.org)

### **Supplementary Tables:**

Supplemental Table 1: Expanded iPSC table for *SNCA* iPSC models

Supplemental Table 2: Functional SSVs/SNPs in the *SNCA* gene

Supplemental Table 3: *SNCA* gene methylation in PD and related disorders

Supplemental Table 4: Transcription factor binding in *SNCA* gene

Supplemental Table 5: Positions/coordinates for UCSC genome browser custom tracks

**Supplemental Table 1: Expanded iPSC table for *SNCA* iPSC models**

| <i>SNCA</i> CNV                            |                                                                                                                                                                                                                                                                                                                                                              |
|--------------------------------------------|--------------------------------------------------------------------------------------------------------------------------------------------------------------------------------------------------------------------------------------------------------------------------------------------------------------------------------------------------------------|
| <b>(Byers et al., 2011)</b>                |                                                                                                                                                                                                                                                                                                                                                              |
| <b>iPSC Source</b>                         | Skin fibroblasts: 1 patient ( <i>SNCA</i> triplication from Iowa kindred, 42 yrs male), 1 control (46 yrs female, mutation-negative sibling)                                                                                                                                                                                                                 |
| <b>iPSC Reprogramming/Number of clones</b> | Lentivirus OSKM, 3 patient clones (Trp18, 17, 43), 3 control clones (Ctrl 1, 2, 3), and H9                                                                                                                                                                                                                                                                   |
| <b>Gene Editing</b>                        | N/A                                                                                                                                                                                                                                                                                                                                                          |
| <b>iPSC Maintenance/Passaging</b>          | On iMEF cells or Matrigel in hESC media /mechanical passaging.                                                                                                                                                                                                                                                                                               |
| <b>Neural Induction</b>                    | Co-culture with stromal cells, for 16d in 15% KOSR/KO-DMEM. After 16d, media changed to N2 for 2d.                                                                                                                                                                                                                                                           |
| <b>Neuronal Differentiation/Time</b>       | Neural rosettes dissection, transfer on PO/L for 7d in N2 (+Shh/C24II, +FGF8, +BDNF, +AA). D 35 mechanical passage on PO/L in N2 (+BDNF, +GDNF, +TGF- $\beta$ , cAMP, AA). Day 50: Final differentiation in N2 (+BDNF, GDNF TGF- $\beta$ 3, cAMP, AA). Total time 50d.                                                                                       |
| <b>Phenotype</b>                           | <i>SNCA</i> -tri and control lines had similar pluripotency marker expression and neuronal differentiation patterns.<br>Alpha-synuclein levels are higher in <i>SNCA</i> -tri iPSCs and neurons compared to controls. There is a 1.5- to 4-fold increased expression of oxidative stress and protein aggregation-related genes in <i>SNCA</i> -tri cultures. |
| <b>(Devine et al., 2011)</b>               |                                                                                                                                                                                                                                                                                                                                                              |
| <b>iPSC Source</b>                         | Skin fibroblasts: 1 patient ( <i>SNCA</i> triplication from Iowa kindred, 55yrs, female), 1 control (first degree relative)                                                                                                                                                                                                                                  |
| <b>iPSC Reprogramming/Number of clones</b> | Retrovirus OSKM, 8 patient clones, 6 control clones                                                                                                                                                                                                                                                                                                          |
| <b>Gene Editing</b>                        | N/A                                                                                                                                                                                                                                                                                                                                                          |
| <b>iPSC Maintenance/Passaging</b>          | On iMEF cells in hESC media (KO-DMEM, 20% KSR, NEAA, $\beta$ -ME, 10ng/ml FGF2) / Mechanical pass.                                                                                                                                                                                                                                                           |
| <b>Neural Induction</b>                    | Monolayer dissociated with Accutase, selection in MEF-CM (+Y27632, +FGF2) on gelatin for 3d, transfer to feeder-free in hESC (KSR +Noggin, + SB4315423, +Dorsomorphin), after 1d +Shh/C24II, +Wnt for 5d.                                                                                                                                                    |

**Supplementary Material:  
hPSC models of SNCA regulation**

|                                            |                                                                                                                                                                                                                                                                                                                                                                                                                                                           |
|--------------------------------------------|-----------------------------------------------------------------------------------------------------------------------------------------------------------------------------------------------------------------------------------------------------------------------------------------------------------------------------------------------------------------------------------------------------------------------------------------------------------|
| <b>Neuronal Differentiation/Time</b>       | Switch to N2B27 for 7d. N2B27 +Shh, +BDNF, +AA, +FGF8). After 3d, mechanical passaging onto PLO! In N2B27 (+AA, +BDNF, +cAMP) for 7d. Total time 23-31d.                                                                                                                                                                                                                                                                                                  |
| <b>Phenotype</b>                           | SNCA-tri and control fibroblasts do not have detectible protein levels of alpha-synuclein. Alpha-synuclein protein detected in all iPSC-derived neurons. Elevated SNCA expression found in SNCA-tri iPSCs which increased with differentiation.<br><br>SNCA-tri -derived neurons showed 2-fold increase of SNCA mRNA compared to controls. For SNCA paralogous genes, SNCG expression was significantly lower in SNCA-tri neurons but SNCB was unchanged. |
| <b>(Flierl et al., 2014)</b>               |                                                                                                                                                                                                                                                                                                                                                                                                                                                           |
| <b>iPSC Source</b>                         | iPSCs 1 patient (SNCA triplication, 42 yrs male), 2 healthy controls (46 yrs female sibling, 61 yr old male) (Byers et al., 2011)                                                                                                                                                                                                                                                                                                                         |
| <b>iPSC Reprogramming/Number of clones</b> | Retrovirus OSKM <sup>1</sup> , 2 clones for SNCA trip, 1 clone each for controls                                                                                                                                                                                                                                                                                                                                                                          |
| <b>Gene Editing</b>                        | N/A                                                                                                                                                                                                                                                                                                                                                                                                                                                       |
| <b>iPSC Maintenance/Passaging</b>          | On iMEF cells + Geltrex in (DMEM/F12, 20% KSO, NEAA, $\beta$ -ME, FGF2)/Mechanical and enzymatic, Coll/ Disp. Accutase passaging.                                                                                                                                                                                                                                                                                                                         |
| <b>Neural Induction</b>                    | EB suspension culture for 4d in EB medium (hESC, -FGF2 +/- Dorsomorphine, SB431542). 2-3d in NIM (DMEM/F12, NEAA, N2, FGF2) feeder free. Manual rosette isolation and feeder free culture with enzymatic passaging in NPC media (Neurobasal, B27, NEAA, FGF2),PSA-NCAM sorting <sup>4</sup> . Total time 7d.                                                                                                                                              |
| <b>Neuronal Differentiation/Time</b>       | N/A                                                                                                                                                                                                                                                                                                                                                                                                                                                       |
| <b>Phenotype</b>                           | SNCA-tri NPCs had normal cellular and mitochondrial morphology but altered growth, viability, cellular energy metabolism, and stress resistance. Knockdown of alpha-synuclein by shRNA reversed phenotypic alterations.                                                                                                                                                                                                                                   |
| <b>(Oliveira et al., 2015)</b>             |                                                                                                                                                                                                                                                                                                                                                                                                                                                           |
| <b>iPSC Source</b>                         | iPSC-derived neural progenitors (NPCs): 1 patient (SNCA triplication, 42 yrs male), 2 controls (unaffected sister, 46 yrs; unrelated healthy control, 62 yrs, male) (Byers et al., 2011; Flierl et al., 2014)                                                                                                                                                                                                                                             |
| <b>iPSC Reprogramming/Number of clones</b> | Retroviral OSKM (1 clone, 2 controls), Lentiviral single vector with OSKM (1 clone)                                                                                                                                                                                                                                                                                                                                                                       |

**Supplementary Material:  
hPSC models of SNCA regulation**

|                                            |                                                                                                                                                                                                                                                                                                                                                                                                                                                                                                                   |
|--------------------------------------------|-------------------------------------------------------------------------------------------------------------------------------------------------------------------------------------------------------------------------------------------------------------------------------------------------------------------------------------------------------------------------------------------------------------------------------------------------------------------------------------------------------------------|
| <b>Gene Editing</b>                        | N/A                                                                                                                                                                                                                                                                                                                                                                                                                                                                                                               |
| <b>iPSC Maintenance/Passaging</b>          | On iMEF cells in hESC media (DMEM/F12, 20% KSR, NEAA, P/S, $\beta$ -ME, L-Glu, FGF2) / Mechanical Passage.                                                                                                                                                                                                                                                                                                                                                                                                        |
| <b>Neural Induction</b>                    | iPSC colonies harvested with collagenase IV, transferred to bacterial petri dish, EBs formed in suspension with agitation on rocker in EB media (hESC media without FGF2 w/wo Dor, SB431532) x4d, EBS cultured with agitation in NIM (DMEM/F12, NEAA, L-FLU, N2) for 2-3d, plated on Geltrex. Rosettes in 2-5d in adherent culture. NiPSCs plated (Geltrex) in NiPSCs media (MACS Neuro Medium, MACS NeuroBrew-21, L-Glu, NEAA, P/S, ESGRO (LIF), bFGF) up to 25 passages (accutase at confluency into new dish). |
| <b>Neuronal Differentiation/Time</b>       | Incubate cells in DA1 medium (MACS Neuro Medium, MACS NeuroBrew-21, L-Glu, P/S, rh-FGF-8a, smoothed agonist SAG) for 10d. Reseed and incubate for 20d in DA2 medium (MACS Neuro Medium, MACS NeuroBrew-21, L-Glu, NEAA, P/S, rh-GDNF, rh-BDNF, dibutyryl-cAMP. Total time ~42d.                                                                                                                                                                                                                                   |
| <b>Phenotype</b>                           | SNCA-tri overexpresses alpha-synuclein and expression increases during <i>in vitro</i> neuronal differentiation. SNCA-tri neurons fail to develop complex networks and showed reduced neurite outgrowth. TH <sup>+</sup> cell number was lower in SNCA-tri than control. Over-expression of alpha-synuclein impairs neuronal maturation. SNCA-tri neurons presented lower neuronal activity. Genes associated with neuronal differentiation and signal transduction were down regulated in SNCA-tri.              |
| <b>(Reyes et al., 2015)</b>                |                                                                                                                                                                                                                                                                                                                                                                                                                                                                                                                   |
| <b>iPSC Source</b>                         | Skin fibroblasts: 1 patient (SNCA triplication), 1 control (mutation negative family member) (Devine et al., 2011)                                                                                                                                                                                                                                                                                                                                                                                                |
| <b>iPSC Reprogramming/Number of clones</b> | Retrovirus pMXs-OSKM                                                                                                                                                                                                                                                                                                                                                                                                                                                                                              |
| <b>Gene Editing</b>                        | N/A                                                                                                                                                                                                                                                                                                                                                                                                                                                                                                               |
| <b>iPSC Maintenance/Passaging</b>          | On SNL feeders in hESC media (KO-DMEM, KSR, L-Glu, NEAA, 2-Merc, P/S, FGF2, Valproate) w/o valproate. Once established, switch to hESC medium with less FGF2.                                                                                                                                                                                                                                                                                                                                                     |

**Supplementary Material:  
hPSC models of SNCA regulation**

|                                            |                                                                                                                                                                                                                                                                                                                                                                                            |
|--------------------------------------------|--------------------------------------------------------------------------------------------------------------------------------------------------------------------------------------------------------------------------------------------------------------------------------------------------------------------------------------------------------------------------------------------|
| <b>Neural Induction</b>                    | Timed exposure to LDN193189/SB431542 (day 0-5), Shh/FGF8 (day 1-7), LDN193189 alone (day 5-11), CHIR99021 (day 3-13). Cells grown on matrigel in KSR (DMEM, KSR, L-Glu, $\beta$ -Me) for 11d. KSR media switched to N2 media on day 5. Day 11 media switched to Neurobasal/B27/L-Glu medium (supp. CHIR [until d13], BDNF, ascorbic acid, GDNF, TGF $\beta$ 3, dibutyl cAMP, DAPT) for 9d. |
| <b>Neuronal Differentiation/Time</b>       | Cells lifted via accutase and replated on polyornithine/laminin/fibronectin on day 20 in differentiation medium (NB/B27+BDNF, ascorbic acid, GDNF, dbcAMP, TGF $\beta$ 3, DAPT) until maturation.<br>Total time 20d.                                                                                                                                                                       |
| <b>Phenotype</b>                           | Differentiated neurons from <i>SNCA</i> -tri patient secrete higher levels alpha-synuclein compared to control neurons. 5-day co-cultures <i>SNCA</i> -tri neurons and N2a cells with restricted cell-to-cell contact showed alpha-synuclein puncta around and within the N2a cells.                                                                                                       |
| <b>(Heman-Ackah et al., 2017)</b>          |                                                                                                                                                                                                                                                                                                                                                                                            |
| <b>iPSC Source</b>                         | iPSCs: patient with <i>SNCA</i> triplication (ND34391G iPSCs, NINDS/Coriell Institute), 1 control (NCRM-5, NIH CRM), 13 CRISPR-edited isogenic clones                                                                                                                                                                                                                                      |
| <b>iPSC Reprogramming/Number of clones</b> | N/A                                                                                                                                                                                                                                                                                                                                                                                        |
| <b>Gene Editing</b>                        | Correction of <i>SNCA</i> triplication in <i>SNCA</i> exon 4 via double-nicking CRISPRs                                                                                                                                                                                                                                                                                                    |
| <b>iPSC Maintenance/Passaging</b>          | On iMEF cells for 4-day expansion, individual clones manually transferred to Matrigel coated 96-well plates and later expanded into 6 well plates.                                                                                                                                                                                                                                         |
| <b>Neural Induction</b>                    | iPSCs cultured in Neural Induction Media (SB431542 and Dorsomorphin) for 30d.                                                                                                                                                                                                                                                                                                              |
| <b>Neuronal Differentiation/Time</b>       | Cell suspension seeded on poly-L-ornithine, day 1 media replaced with Neuronal Differentiation Medium (Neurobasal, B27, GlutaMax, BDNF, GDNF, dbcAMP), media replaced every other day x10-14 d.<br>Total time ~45d.                                                                                                                                                                        |

**Supplementary Material:  
hPSC models of SNCA regulation**

|                                            |                                                                                                                                                                                                                                                                                                                                                                                                                                                                                     |
|--------------------------------------------|-------------------------------------------------------------------------------------------------------------------------------------------------------------------------------------------------------------------------------------------------------------------------------------------------------------------------------------------------------------------------------------------------------------------------------------------------------------------------------------|
| <b>Phenotype</b>                           | Alpha-synuclein mRNA and protein levels were reduced in CRISPR-edited isogenic iPSC clones (2 functional SNCA gene copies). SNCA-tri has little effect on neuronal differentiation based on RNA-Seq. 90-fold overexpression of SNCA mRNA in SNCA-tri neurons were restored in isogenic controls. The three branches of UPR were upregulated in AST neurons. SNCA-tri showed ER stress phenotype, induction of IRE1a/XBP1 axis (unfolded protein response (UPR)) and UPR activation. |
| <b>(Mittal et al., 2017)</b>               |                                                                                                                                                                                                                                                                                                                                                                                                                                                                                     |
| <b>iPSC Source</b>                         | iPSC-derived NPCs: 1 patient (SNCA triplication, 42 yrs male), 1 healthy control (46 yrs female sibling) (Flierl et al., 2014)                                                                                                                                                                                                                                                                                                                                                      |
| <b>iPSC Reprogramming/Number of clones</b> | N/A                                                                                                                                                                                                                                                                                                                                                                                                                                                                                 |
| <b>Gene Editing</b>                        | N/A                                                                                                                                                                                                                                                                                                                                                                                                                                                                                 |
| <b>iPSC Maintenance/Passaging</b>          | On iMEF cells + Geltrex in (DMEM/F12, 20% KSO, NEAA, $\beta$ -ME, FGF2)/Mechanical and enzymatic, Coll/ Disp. Accutase passaging.                                                                                                                                                                                                                                                                                                                                                   |
| <b>Neural Induction</b>                    | EB suspension culture for 4d in EB medium (hESC, -FGF2 +/- Dorsomorphine, SB431542). 2-3d in NIM (DMEM/F12, NEAA, N2, FGF2) feeder free. Manual rosette isolation and feeder free culture with enzymatic passaging in NPC media (Neurobasal, B27, NEAA, FGF2),PSA-NCAM sorting <sup>4</sup> . Total time 7d.                                                                                                                                                                        |
| <b>Neuronal Differentiation/Time</b>       | N/A                                                                                                                                                                                                                                                                                                                                                                                                                                                                                 |
| <b>Phenotype</b>                           | Beta-adrenoreceptor agonist clenbuterol reduces alpha-synuclein expression by 20% in SNCA-tri NPCs. Clenbuterol reduces mitochondria-associated superoxide in SNCA-tri and positively affects viability when exposed to rotenone. Alpha-synuclein downregulation by beta-adrenoreceptor agonists was shown to be mediated by a decrease in H3K27 acetylation in promoter and intron 4 enhancers of the SNCA gene.                                                                   |
| <b>SNCA Point Mutations</b>                |                                                                                                                                                                                                                                                                                                                                                                                                                                                                                     |
| <b>(Chung et al., 2013)</b>                |                                                                                                                                                                                                                                                                                                                                                                                                                                                                                     |
| <b>iPSC Source</b>                         | iPSCs (SNCA, p.A53T (female, AAO 49yrs, (Golbe et al., 1996; Soldner et al., 2011)) and SNCA triplication (Byers et al., 2011), 1 male control (BG01)                                                                                                                                                                                                                                                                                                                               |
| <b>iPSC Reprogramming/Number of clones</b> | Lentivirus KOS (inducible, excisable)/ 2 subclones /genotype                                                                                                                                                                                                                                                                                                                                                                                                                        |

**Supplementary Material:  
hPSC models of SNCA regulation**

|                                            |                                                                                                                                                                                                                                                                                                                                                                                                                                         |
|--------------------------------------------|-----------------------------------------------------------------------------------------------------------------------------------------------------------------------------------------------------------------------------------------------------------------------------------------------------------------------------------------------------------------------------------------------------------------------------------------|
| <b>Gene Editing</b>                        | Correction of mutation in patient A53T iPSC by ZFN                                                                                                                                                                                                                                                                                                                                                                                      |
| <b>iPSC Maintenance/Passaging</b>          | On iMEF cells in hESC medium (DMEM/F12, 15%FBS, 5% KSO, NEAA, $\beta$ -ME, FGF2) mechanical or enzymatic.                                                                                                                                                                                                                                                                                                                               |
| <b>Neural Induction</b>                    | Feeder-free, enzymatic pass (Accutase) in mTESR1. Dissoc. iPSC resuspended and aggregated in DMEM/F12 (1% N2, 1% B27, Noggin, SB431542, Y-27632). D4: EB transfer to feeder-free (Matrigel) FGF2, Dkk1. Day 10 rosettes dissected, enzymatic, replate on PO/L in NPC medium (Neurobasal, FGF2, Y27632) /2 clones/genotype.                                                                                                              |
| <b>Neuronal Differentiation/Time</b>       | NPCs dissociated enzymatically (Disp.) and replated feeder-free (Matrigel) in Neurobasal Medium (BDNF, GDNF, cAMP). D7-9 cells were replated on PO/L in Neurobasal medium for <5d. Total time 19-20d.                                                                                                                                                                                                                                   |
| <b>Phenotype</b>                           | In yeast, nitrosative stress is caused by alpha-synuclein and contributes to toxicity. There is also increased nitric oxide in A53T cortical neurons compared to corrected neurons. SNCA p.A53T alpha-synuclein leads to ERAD dysfunction. NAB2, an N-arylbenzimidazole, activates Rsp5/Nedd4 pathway and reduced nitric oxide levels in SNCA p.A53T neurons. NAB2 improves forward protein trafficking through ER in SNCA-tri neurons. |
| <b>(Soldner et al., 2011)</b>              |                                                                                                                                                                                                                                                                                                                                                                                                                                         |
| <b>iPSC Source</b>                         | Skin fibroblasts 1 patient (SNCA p.A53T mutation, (Golbe et al., 1996) and Table S1 (Chung et al., 2013), BG01 and WIBR3 hESCs                                                                                                                                                                                                                                                                                                          |
| <b>iPSC Reprogramming/Number of clones</b> | Lentivirus OSKM, (Dox-inducible., Cre-excisable.). 1 clone /genotype                                                                                                                                                                                                                                                                                                                                                                    |
| <b>Gene Editing</b>                        | SNCA p.A53T and p.E46K gene editing by ZFN, 1 p.A53T "corrected" clone (WIBR-iPS-SNCA), 1 p.E46K induced clone (BGO1)                                                                                                                                                                                                                                                                                                                   |
| <b>iPSC Maintenance/Passaging</b>          | On iMEF cells in hESC medium (DMEM/F12, 15% FBS, 5% KSR, NEAA, $\beta$ -ME, FGF2) / mechanical + enzymatic (Coll/Disp) passaging.                                                                                                                                                                                                                                                                                                       |
| <b>Neural Induction</b>                    | Matrigel cultured iPSCs in MEF-conditioned medium (+FGF2) Coll dissociated. Forced-aggregate formation of EBs, feeder-free suspension culture in A: [1%N2, 4% B27/DMEM:F12] with Y-27632 and Noggin or Dorsomorphin for 1-2d. Transfer to feeder-free culture in A ( -Y-27632, +Dkk1, +FGF2). /Multiple clones used for targeting, analysis of 1-4 clones/genotype.                                                                     |

**Supplementary Material:  
hPSC models of SNCA regulation**

|                                            |                                                                                                                                                                                                                                                                                                                                                                                                                                                                                                                                                              |
|--------------------------------------------|--------------------------------------------------------------------------------------------------------------------------------------------------------------------------------------------------------------------------------------------------------------------------------------------------------------------------------------------------------------------------------------------------------------------------------------------------------------------------------------------------------------------------------------------------------------|
| <b>Neuronal Differentiation/Time</b>       | Neural Rosette formation for 8d in suspension culture with EB medium. At d 8 plated on fibronectin dishes in ITS <sup>10</sup> . After 8d, enzymatic pass onto PO/L in N2 medium plus AA, FGF2, FGF8, Shh for 8d. Terminal differentiation in N2 (- FGF2, FGF8, Shh) for 8d. Mechanical pass. on stromal feeder cells for 14d, followed by 7d in N2 (all 21d with noggin), Neural Rosettes at d21 pass. on PO/L for 16d in N2 medium with Shh, FGF8, BDNF, AA. Final differentiation in N2 plus BDNF, TGF-β3, GDNF, cAMP, AA for 5d. Total time 76d.         |
| <b>Phenotype</b>                           | Several pairs of ZFN-isogenic hiPSC/hESCs were generated and characterized for neuronal differentiation: hESC – hESC <sup>SNCA A53T/wt</sup> , hESC - hESC <sup>SNCA E46K/wt</sup> , hiPSC SNCA p.53T – hiPSC corrected.<br>SNCA p.A53T was inserted into SNCA gene via ZFN without drug selection. Increased efficiency of introducing a second mutation (SNCA p.E46K) via single-stranded oligodeoxynucleotides into hESCs. SNCA wild-type sequence containing donor vector and ZFNs genetically corrected SNCA p.A53T mutation in patient-derived hiPSCs. |
| <b>(Ryan et al., 2013)</b>                 |                                                                                                                                                                                                                                                                                                                                                                                                                                                                                                                                                              |
| <b>iPSC Source</b>                         | 2 isogenic pairs: iPSCs (Soldner et al., 2011) (SNCA p.A53T and paired mutation ZFN-corrected clone); hESC (BG01) line and paired ZFN-induced SNCA p.A53T mutation                                                                                                                                                                                                                                                                                                                                                                                           |
| <b>iPSC Reprogramming/Number of clones</b> | Lentivirus KOS, (Dox inducible, Cre-excisable) <sup>8</sup> /6 clones each for p.A53T and isogenic controls                                                                                                                                                                                                                                                                                                                                                                                                                                                  |
| <b>Gene Editing</b>                        | Correction of mutation A53T iPSC; introduction of mutation in hESC by ZFN <sup>8</sup>                                                                                                                                                                                                                                                                                                                                                                                                                                                                       |
| <b>iPSC Maintenance/Passaging</b>          | On HFF in hESC medium +20% KSR, +bFGF <sup>12</sup> / mechanical passaging                                                                                                                                                                                                                                                                                                                                                                                                                                                                                   |
| <b>Neural Induction</b>                    | iPSC colony dissociation into monolayer, feeder-free culture, enzymatic pass. (Coll, Disp). Induction by KSR media with LDN193189, SB4315423 <sup>3</sup> , Shh, C25II, Puromorphamine, FGF8 for 5d /2 clones/genotype.                                                                                                                                                                                                                                                                                                                                      |
| <b>Neuronal Differentiation/Time</b>       | Shift to N2 medium over 6d. D11 change to Neurobasal/B27, +CHIR. D 13 CHIR replaced by BDNF, GDNF, AA, TGF-β3, cAMP, DAPT for 9d. D20 enzymatic pass. & on PO/L + fibronectin in Neurobasal/B27, +BDNF, GDNF, AA, cAMP, TGF-β3, DAPT. Total time 20d.                                                                                                                                                                                                                                                                                                        |



**Supplementary Material:  
hPSC models of SNCA regulation**

|                                                      |                                                                                                                                                                                                                                                                                                                                                                                                                                                                                     |
|------------------------------------------------------|-------------------------------------------------------------------------------------------------------------------------------------------------------------------------------------------------------------------------------------------------------------------------------------------------------------------------------------------------------------------------------------------------------------------------------------------------------------------------------------|
| <b>Phenotype</b>                                     | iPSC-derived dopaminergic neurons from <i>SNCA</i> p.A53T carrier show alpha-synuclein aggregation resembling Lewy body-like pathology.<br><i>SNCA</i> p.A53T mutant neurons display variations in mitochondrial machinery and an increase in mitochondrial toxin susceptibility. ROS/RNS abundance leads to changes of MEF2C in <i>SNCA</i> p.A53T neurons.                                                                                                                        |
| <b><i>SNCA</i> Risk Variants and Gene Regulation</b> |                                                                                                                                                                                                                                                                                                                                                                                                                                                                                     |
| <b>(Soldner et al., 2016)</b>                        |                                                                                                                                                                                                                                                                                                                                                                                                                                                                                     |
| <b>iPSC Source</b>                                   | hiPSC line derived from fibroblast AG20446 (male, PD, 57yrs) and 2 hESCs from Whitehead Institute Center for Human Stem Cell Research and NIH (WIBR3, BG01)                                                                                                                                                                                                                                                                                                                         |
| <b>iPSC Reprogramming/Number of clones</b>           | N/A                                                                                                                                                                                                                                                                                                                                                                                                                                                                                 |
| <b>Gene Editing</b>                                  | CRISPR/Cas9 (delete and insert intron enhancer [1834 bp] elements at rs356168 and rs3756054, NACP-Rep 1 [relative sizes: 257 bp, 259 bp, 261 bp, 263 bp] insertion). Lentiviral DOX-induced transgene expression                                                                                                                                                                                                                                                                    |
| <b>iPSC Maintenance/Passaging</b>                    | iMEFs in hESC media (DMEM/F12, FBS, KSR, Glu, NEAA, $\beta$ -ME, FGF2), passaged manually or enzymatically (collagenase type IV)                                                                                                                                                                                                                                                                                                                                                    |
| <b>Neural Induction</b>                              | iPSCs separated from MEFs, cultured in suspension in EB media (DMEM supp. KSR, Glu, NEAA, $\beta$ -ME, hrNoggin, dorsomorphin) for 8d. EBs plated on poly-L-ornithine/laminin/fibronectin in N2 medium (supp. hrNoggin, dorsomorphin, FGF2). Rosettes microdissected out with trypsin, expanded on poly-L-ornithine/laminin/fibronectin in N2 media with FGF2.                                                                                                                      |
| <b>Neuronal Differentiation/Time</b>                 | NPCs passaged 2-4 times, media switched to N2 media supplemented with ascorbic acid, neurons terminally differentiated between day 25 and 31. Total time 25-31d.                                                                                                                                                                                                                                                                                                                    |
| <b>Phenotype</b>                                     | Generation of CRISPR-modified isogenic hESC allelic panels for <i>SNCA</i> gene risk variants rs356168 and NACP-Rep-1. CRISPR insertion of G-allele at rs356168 results in increased expression of <i>SNCA</i> . Sequence-specific binding of TFs EMX2 and NKX6-1 represses intron 4 enhancer activity, modulating <i>SNCA</i> expression.<br><br>Allelic series of NACP-Rep1 (genotypes 257/261, 259/261 261/261 263/261) did not show expression differences for alpha-synuclein. |
| <b>(Heman-Ackah et al., 2016)</b>                    |                                                                                                                                                                                                                                                                                                                                                                                                                                                                                     |

**Supplementary Material:  
hPSC models of SNCA regulation**

|                                            |                                                                                                                                                                                                                                                                                                                                                                                                            |
|--------------------------------------------|------------------------------------------------------------------------------------------------------------------------------------------------------------------------------------------------------------------------------------------------------------------------------------------------------------------------------------------------------------------------------------------------------------|
| <b>iPSC Source</b>                         | Skin fibroblasts: a patient with <i>SNCA</i> triplication (ND34391G, iPSCs from NINDS/Coriell Institute), 1 control (NCRM-5, RUDCR Infinite Biologics)                                                                                                                                                                                                                                                     |
| <b>iPSC Reprogramming/Number of clones</b> | N/A                                                                                                                                                                                                                                                                                                                                                                                                        |
| <b>Gene Editing</b>                        | CRISPRi-dCas9 targeting <i>SCNA</i> exon 1, 2, and 4.                                                                                                                                                                                                                                                                                                                                                      |
| <b>iPSC Maintenance/Passaging</b>          | On iMEFs in DMEM/F12 (20% KSR, GlutaMax, MEM NEAA, 0.1 mM $\beta$ -ME, 10 ng/mL bFGF), passaged manually. For feeder-free, passaged with collagenase IV on Matrigel coated plates in E8 media with ROCK inhibitor.                                                                                                                                                                                         |
| <b>Neural Induction</b>                    | Control NSCs derived by NIH CRM via PSC Neural Induction Medium and maintained in StemPro NSC SFM (kDMEM, StemPro Neural Supplement, GlutaMax, 20 ng/mL EGF, 20 ng/mL bFGF) <i>SNCA</i> -tri NSCs derived by Applied StemCell NSC Generation Service and maintained in Applied StemCell NSC Expansion Medium (1:1 Neurobasal and DMEM, GlutaMax, N2 supplement, 20 ng/mL bFGF). All NSCs grown on Geltrex. |
| <b>Neuronal Differentiation/Time</b>       | Cell suspension seeded on poly-L-ornithine, day 1 media replaced with Neuronal Differentiation Medium (Neurobasal, B27, GlutaMax, BDNF, GDNF), media replaced every other day x7d. Following transfection, cells plated on poly-ornithine/laminin in Neuronal Differentiation Medium (w/ 10 $\mu$ M ROCK inhibitor and 0.5 Mm dbcAMP). Total time 7d post NSCs.                                            |
| <b>Phenotype</b>                           | Binding affinity between different sgRNAs and relative position to the TSS are critical for CRISPRi. dCas9 can be used for gene expression manipulations and gene contributions of neurodegenerative disease.<br><br>CRISPR/dCas9-KRAB and TSS2-1 sgRNA expression reduced endogenous alpha-synuclein mRNA levels in <i>SNCA</i> -tri iPSC-derived neurons by 40%.                                         |
| <b>(Tagliafierro et al., 2017)</b>         |                                                                                                                                                                                                                                                                                                                                                                                                            |
| <b>iPSC Source</b>                         | iPSCs from healthy patient (GM23280, Coriell Repository), iPSCs from <i>SNCA</i> -tri patient (ND34391, NINDS Repository)                                                                                                                                                                                                                                                                                  |
| <b>iPSC Reprogramming/Number of clones</b> | N/A                                                                                                                                                                                                                                                                                                                                                                                                        |
| <b>Gene Editing</b>                        | N/A                                                                                                                                                                                                                                                                                                                                                                                                        |
| <b>iPSC Maintenance/Passaging</b>          | On feeder-free Matrigel coated plates in mTeSR media, passaged enzymatically                                                                                                                                                                                                                                                                                                                               |

**Supplementary Material:  
hPSC models of SNCA regulation**

|                                      |                                                                                                                                                                                                                                                                                                                                                                                                                                                                                                                                                                                                            |
|--------------------------------------|------------------------------------------------------------------------------------------------------------------------------------------------------------------------------------------------------------------------------------------------------------------------------------------------------------------------------------------------------------------------------------------------------------------------------------------------------------------------------------------------------------------------------------------------------------------------------------------------------------|
| <b>Neural Induction</b>              | <p>mDA: EBs formed on AggreWells in NIM with Y27632, plated on Matrigel 5 days later, 1 day later SHH supplemented. Day 12 rosettes selected via Neural Rosette Selection Reagent and put on Matrigel plates with N2B27 media (supp. CHIR99021, SB431542, BSA, bFGF, EGF)</p> <p>BFCNs: EBs formed on AggreWells in NIM. Day 5 EBs replated and media changed daily. Day 8-12 neural rosettes grown in NEM (7 parts KO-DMEM, 3 parts F12, GlutaMax, P/S, B27, FGF, EGF, heparin, SB431542, Y27632). Rosettes selected via NRSR and replated in NEM on Matrigel containing SB431542 and Y27632 for 10d.</p> |
| <b>Neuronal Differentiation/Time</b> | <p>mDA: NPCs passaged onto poly-L-ornithine/laminin in N2B27 media (FGF8, purmorphamine, db-cAMP, L-AA) x14d. Day 14 on, cells fed Maturation Media (GDNF, BDNF, DAPT, db-cAMP, L-AA) and changed every other day.</p> <p>BFCNs: Y27632 withdrawn on day 23, cells plated on poly-L-ornithine/laminin in BrainPhys Neuronal Medium (supp. N2, B27, BDNF, GDNF, L-AA, and db-cAMP), media changed every other day until day 45-50. Total time: mDA:14d, BFCNs: 45-50d.</p>                                                                                                                                  |
| <b>Phenotype</b>                     | <p>Differentiation into two different neuronal cell types, midbrain dopaminergic and cholinergic neurons, were developed. MiR-7-5p, miR-153-3p, and miR223-3p had higher levels in dopaminergic neurons while miR-140-3p was only slightly increased in cholinergic neurons. SNCA-tri miR-7-5p levels in neurons were 10-fold decreased compared to control neurons, other miRNAs showed similar trends as in control neurons.</p>                                                                                                                                                                         |

**References to Supplementary Table 1.**

- Byers, B., Cord, B., Nguyen, H.N., Schüle, B., Fenno, L., Lee, P.C., et al. (2011). SNCA triplication Parkinson's patient's iPSC-derived DA neurons accumulate alpha-synuclein and are susceptible to oxidative stress. *PLoS One* 6(11), e26159. doi: 10.1371/journal.pone.0026159.
- Chung, C.Y., Khurana, V., Auluck, P.K., Tardiff, D.F., Mazzulli, J.R., Soldner, F., et al. (2013). Identification and rescue of alpha-synuclein toxicity in Parkinson patient-derived neurons. *Science* 342(6161), 983-987. doi: 10.1126/science.1245296.
- Devine, M.J., Ryten, M., Vodicka, P., Thomson, A.J., Burdon, T., Houlden, H., et al. (2011). Parkinson's disease induced pluripotent stem cells with triplication of the alpha-synuclein locus. *Nat Commun* 2, 440. doi: 10.1038/ncomms1453.
- Flierl, A., Oliveira, L.M., Falomir-Lockhart, L.J., Mak, S.K., Hesley, J., Soldner, F., et al. (2014). Higher vulnerability and stress sensitivity of neuronal precursor cells carrying an alpha-synuclein gene triplication. *PLoS One* 9(11), e112413. doi: 10.1371/journal.pone.0112413.

**Supplementary Material:  
hPSC models of SNCA regulation**

- Golbe, L.I., Di Iorio, G., Sanges, G., Lazzarini, A.M., La Sala, S., Bonavita, V., et al. (1996). Clinical genetic analysis of Parkinson's disease in the Contursi kindred. *Ann Neurol* 40(5), 767-775. doi: 10.1002/ana.410400513.
- Heman-Ackah, S.M., Bassett, A.R., and Wood, M.J. (2016). Precision Modulation of Neurodegenerative Disease-Related Gene Expression in Human iPSC-Derived Neurons. *Sci Rep* 6, 28420. doi: 10.1038/srep28420.
- Heman-Ackah, S.M., Manzano, R., Hoozemans, J.J.M., Scheper, W., Flynn, R., Haerty, W., et al. (2017). Alpha-synuclein induces the unfolded protein response in Parkinson's disease SNCA triplication iPSC-derived neurons. *Hum Mol Genet* 26(22), 4441-4450. doi: 10.1093/hmg/ddx331.
- Mittal, S., Bjornevik, K., Im, D.S., Flierl, A., Dong, X., Locascio, J.J., et al. (2017). beta2-Adrenoreceptor is a regulator of the alpha-synuclein gene driving risk of Parkinson's disease. *Science* 357(6354), 891-898. doi: 10.1126/science.aaf3934.
- Oliveira, L.M., Falomir-Lockhart, L.J., Botelho, M.G., Lin, K.H., Wales, P., Koch, J.C., et al. (2015). Elevated alpha-synuclein caused by SNCA gene triplication impairs neuronal differentiation and maturation in Parkinson's patient-derived induced pluripotent stem cells. *Cell Death Dis* 6, e1994. doi: 10.1038/cddis.2015.318.
- Reyes, J.F., Olsson, T.T., Lamberts, J.T., Devine, M.J., Kunath, T., and Brundin, P. (2015). A cell culture model for monitoring alpha-synuclein cell-to-cell transfer. *Neurobiol Dis* 77, 266-275. doi: 10.1016/j.nbd.2014.07.003.
- Ryan, S.D., Dolatabadi, N., Chan, S.F., Zhang, X., Akhtar, M.W., Parker, J., et al. (2013). Isogenic human iPSC Parkinson's model shows nitrosative stress-induced dysfunction in MEF2-PGC1alpha transcription. *Cell* 155(6), 1351-1364. doi: 10.1016/j.cell.2013.11.009.
- Soldner, F., Laganier, J., Cheng, A.W., Hockemeyer, D., Gao, Q., Alagappan, R., et al. (2011). Generation of isogenic pluripotent stem cells differing exclusively at two early onset Parkinson point mutations. *Cell* 146(2), 318-331.
- Soldner, F., Stelzer, Y., Shivalila, C.S., Abraham, B.J., Latourelle, J.C., Barrasa, M.I., et al. (2016). Parkinson-associated risk variant in distal enhancer of alpha-synuclein modulates target gene expression. *Nature* 533(7601), 95-99. doi: 10.1038/nature17939.
- Tagliafierro, L., Glenn, O.C., Zamora, M.E., Beach, T.G., Woltjer, R.L., Lutz, M.W., et al. (2017). Genetic analysis of alpha-synuclein 3' untranslated region and its corresponding microRNAs in relation to Parkinson's disease compared to dementia with Lewy bodies. *Alzheimers Dement* 13(11), 1237-1250. doi: 10.1016/j.jalz.2017.03.001.

**Supplemental Table 2: Functional SSVs/SNPs in the *SNCA* gene**

| SNPs      | Location within <i>SNCA</i> | Functional /biological effect                                           | System              | Cohort, sample size                            | Reference                         |
|-----------|-----------------------------|-------------------------------------------------------------------------|---------------------|------------------------------------------------|-----------------------------------|
| Rep1      | 5' region                   | Decrease of mRNA expression with short allele                           | brain               | 144 controls (SN, temporal and frontal cortex) | Linnertz et al. 2009 <sup>1</sup> |
|           |                             |                                                                         | brain               | 17 PD, 24 controls                             | Fuchs et al. 2008 <sup>2</sup>    |
| rs2736990 | Intron                      | Increase <i>SNCA</i> 112/140 ratio (GG highest ratio)                   | frontal cortex      | 117 controls (frontal cortex)                  | McCarthy et al. 2011 <sup>3</sup> |
| rs356168  | Intron                      | No difference for G-allele for <i>SNCA</i> expression                   | temporal cortex     | 134 controls (frontal, temporal cortex)        | Glenn et al. 2017 <sup>4</sup>    |
|           |                             | Associated with longer 3'UTR                                            | human cortex        | 17 PD, 17 ctrl, 16 ALS                         | Rhinn et al. 2012 <sup>5</sup>    |
|           |                             | G-allele increase of <i>SNCA</i> expression, binding to EMX2 and NKX6-1 | iPSC neurons        | CRISPR-modified stem cell line                 | Soldner et al. 2016 <sup>6</sup>  |
| rs356165  | 3' region                   | Increase <i>SNCA</i> 112/140 ratio (GG highest ratio)                   | frontal cortex      | 117 controls (frontal cortex)                  | McCarthy et al. 2011 <sup>3</sup> |
|           |                             | Lower mRNA levels                                                       | temporal cortex, SN | 144 controls (SN, temporal frontal cortex)     | Linnertz et al. 2009 <sup>1</sup> |
|           |                             | No difference in isoform levels                                         | brain               | 9 PD, 6 ctrl, PMI 5-82hrs                      | Cardo et al. 2014 <sup>7</sup>    |
| rs356219  | 3' region                   | Increase <i>SNCA</i> 112/140 ratio (GG highest ratio)                   | frontal cortex      | 117 controls (frontal cortex)                  | McCarthy et al. 2011 <sup>3</sup> |
|           |                             | CT associated with higher <i>SNCA</i> levels                            | substantia nigra    | 17 PD, 24 controls                             | Fuchs et al. 2008 <sup>2</sup>    |
|           |                             | TT associated with higher <i>SNCA</i> levels                            | cerebellum          | 17 PD, 24 controls                             | Fuchs et al. 2008 <sup>2</sup>    |

**Supplementary Material:  
hPSC models of SNCA regulation**

|            |           |                                                    |                     |                                         |                                   |
|------------|-----------|----------------------------------------------------|---------------------|-----------------------------------------|-----------------------------------|
|            |           | No effect                                          | blood               | 115 PD, 79 controls                     | Fuchs et al. 2008 <sup>2</sup>    |
|            |           | Lower mRNA levels                                  | temporal cortex, SN | 144 ctrl (SN, temporal, frontal cortex) | Linnertz et al. 2009 <sup>1</sup> |
|            |           | CC genotype associated with increased a-syn        | plasma              | 86 PD, 78 controls                      | Mata et al. 2010 <sup>8</sup>     |
| rs11931074 | 3' region | T allele associated with reduced a-syn levels      | serum               | 110 PD, 136 controls                    | Hu et al. 2012 <sup>9</sup>       |
|            |           | No difference in isoform levels                    | brain               | 9 PD, 6 ctrl, PMI 5-82hrs               | Cardo et al. 2014 <sup>7</sup>    |
| rs17016074 | 3'UTR     | Luciferase assay: minor allele expresses more SNCA | luciferase assay    | SH-SY5Y                                 | Sotiriou et al. 2009              |

**References to Supplementary Table 2:**

- 1 Linnertz, C. *et al.* Genetic regulation of alpha-synuclein mRNA expression in various human brain tissues. *PLoS one* **4**, e7480 (2009).
- 2 Fuchs, J. *et al.* Genetic variability in the SNCA gene influences alpha-synuclein levels in the blood and brain. *FASEB journal : official publication of the Federation of American Societies for Experimental Biology* **22**, 1327-1334, doi:10.1096/fj.07-9348com (2008).
- 3 McCarthy, J. J. *et al.* The effect of SNCA 3' region on the levels of SNCA-112 splicing variant. *Neurogenetics* **12**, 59-64, doi:10.1007/s10048-010-0263-4 (2011).
- 4 Glenn, O. C., Tagliafierro, L., Beach, T. G., Woltjer, R. L. & Chiba-Falek, O. Interpreting Gene Expression Effects of Disease-Associated Variants: A Lesson from SNCA rs356168. *Frontiers in genetics* **8**, 133, doi:10.3389/fgene.2017.00133 (2017).
- 5 Rhinn, H. *et al.* Alternative alpha-synuclein transcript usage as a convergent mechanism in Parkinson's disease pathology. *Nature communications* **3**, 1084, doi:10.1038/ncomms2032 (2012).
- 6 Soldner, F. *et al.* Parkinson-associated risk variant in distal enhancer of alpha-synuclein modulates target gene expression. *Nature* **533**, 95-99, doi:10.1038/nature17939 (2016).
- 7 Cardo, L. F. *et al.* Alpha-synuclein transcript isoforms in three different brain regions from Parkinson's disease and healthy subjects in relation to the SNCA rs356165/rs11931074 polymorphisms. *Neuroscience letters* **562**, 45-49, doi:10.1016/j.neulet.2014.01.009 (2014).

**Supplementary Material:  
hPSC models of SNCA regulation**

- 8 Mata, I. F. *et al.* SNCA variant associated with Parkinson disease and plasma alpha-synuclein level. *Archives of neurology* **67**, 1350-1356, doi:10.1001/archneurol.2010.279 (2010).
- 9 Hu, Y. *et al.* Variant in the 3' region of SNCA associated with Parkinson's disease and serum alpha-synuclein levels. *Journal of neurology* **259**, 497-504, doi:10.1007/s00415-011-6209-4 (2012).

**Supplemental Table 3: SNCA gene methylation in PD and related disorders**

| Location/genomic regions                      | Method                                                                                       | % methylation                                                                                                                                                      | Cell type/tissue                                          | PD                                                                                                                | Reference                          |
|-----------------------------------------------|----------------------------------------------------------------------------------------------|--------------------------------------------------------------------------------------------------------------------------------------------------------------------|-----------------------------------------------------------|-------------------------------------------------------------------------------------------------------------------|------------------------------------|
| <b>Brain: SNCA gene</b>                       |                                                                                              |                                                                                                                                                                    |                                                           |                                                                                                                   |                                    |
| SNCA promoter and intron 1                    | Bisulfite sequencing of 10 clones, SNCA promoter (-2079/-1507) and SNCA intron 1 (-926/-483) | Significantly fewer methylated CpG sites in PD, DNA at specific positions (8, 12, and 17) within intron 1, located within predicted consensus binding sites of TFs | SN, cortex, putamen                                       | PD vs controls (SN and cortex: 6 cases, 6 controls, putamen: 6 cases, 8 controls)                                 | Jowaed et al. 2010 <sup>1</sup>    |
| SNCA intron 1 (CpG-2, 13 CpGs)                | Bisulfite sequencing of 20 clones                                                            | Only demethylation in SN, not in putamen or anterior cingulate                                                                                                     | SN, putamen, anterior cingulate                           | 11 PD, 1 DLB, 8 controls                                                                                          | Matsumoto et al. 2010 <sup>2</sup> |
| SNCA intron 1                                 | Methylation-specific PCR                                                                     | Significant hypomethylation                                                                                                                                        | cortex                                                    | PD, DLB, controls (4 samples each)                                                                                | Desplats et al. 2011 <sup>3</sup>  |
| SNCA promoter (17CpGs) and intron 1 (19 CpGs) | 454 GS-FLX-based high-resolution bisulphite sequencing                                       | No significant difference between LBD and controls, average methylation of SNCA promoter 0.2-0.8%, SNCA intron 1 0.5-3% methylation                                | SN, putamen, cingulate gyrus, temporal cortex, cerebellum | LBD vs controls (15 cases, 6 controls), Braak staging                                                             | de Boni et al. 2011 <sup>4</sup>   |
| SNCA intron 1                                 | Bisulfite sequencing of 10 clones, pyrosequencing                                            | Minor increase in methylation with aging, no gender difference, methylation was higher in neurons compared to non-neuronal cells                                   | whole brain                                               | 36 samples (20 male, 16 females, fetus to 90yrs), FACS-sorted neurons and non-neuronal cells from 5 brain samples | de Boni et al. 2015 <sup>5</sup>   |



**Supplementary Material:  
hPSC models of SNCA regulation**

| Location/genomic regions                            | Method                                     | % methylation                                                                                                                                                   | Cell type/tissue | PD                                       | Reference                             |
|-----------------------------------------------------|--------------------------------------------|-----------------------------------------------------------------------------------------------------------------------------------------------------------------|------------------|------------------------------------------|---------------------------------------|
| <i>SNCA</i> intron 1                                | Bisulfite sequencing of 23 CpGs, 10 clones | No difference, hypomethylated 3.04% PD vs. 3.17% controls, no change in mRNA or protein expression                                                              | substantia nigra | PD vs controls (8 cases, 8 controls)     | Guhathakurta et al. 2017 <sup>6</sup> |
| <b>Brain: Global methylation</b>                    |                                            |                                                                                                                                                                 |                  |                                          |                                       |
| Global methylation                                  | IHC anti 5-mC, ELISA kit                   | Hypomethylation in PD and DLB (2-fold by IHC, 30% by ELISA)                                                                                                     | cortex           | PD, DLB, controls (4 samples each)       | Desplats et al. 2011 <sup>3</sup>     |
| Global methylation                                  | Infinium Human 450K beadchip               | 0.6% genes differentially methylated, 317 increased, 2591 decreased                                                                                             | frontal cortex   | PD vs controls (5 cases, 6 controls)     | Masliah et al. 2013 <sup>7</sup>      |
| Global methylation                                  | Infinium Human 450K beadchip               | 0.8% genes differentially methylated, 476 increased, 3421 decreased                                                                                             | leukocytes       | PD vs controls (5 cases, 6 controls)     | Masliah et al. 2013 <sup>7</sup>      |
| Global methylation                                  | ELISA kit                                  | No difference                                                                                                                                                   | cerebellum       | PD vs controls (36 cases, 27 controls)   | Stoger et al. 2017 <sup>8</sup>       |
| Global hydroxymethylation                           | ELISA kit                                  | 2-fold difference (0.25% vs. 0.55%, p<0.001)                                                                                                                    | cerebellum       | PD vs controls (36 cases, 27 controls)   | Stoger et al. 2017 <sup>8</sup>       |
| <b>Peripheral tissues: SNCA gene</b>                |                                            |                                                                                                                                                                 |                  |                                          |                                       |
| <i>SNCA</i> CpG-1, CpG-2, and <i>LRRK2</i> promoter | Bisulfite-specific PCR-based sequencing    | Hypomethylation in PD at CpG-2 (5.9% PD vs. 7.69% ctrl), no difference at CpG-1; <i>SNCA</i> mRNA increased in PD, hypomethylation even lower in early-onset PD | leukocytes       | PD vs controls (100 cases, 100 controls) | Tan et al. 2014 <sup>9</sup>          |
| <i>SNCA</i> intron 1 (13 CpGs)                      | Bisulfite pyrosequencing                   | No difference, methylation level 9.17% in PD, 9.97% in controls                                                                                                 | leukocytes       | PD vs controls (50 cases, 50 controls)   | Song et al. 2014 <sup>10</sup>        |
| <i>SNCA</i> intron 1 (10 CpGs)                      | Bisulfite pyrosequencing                   | Overall mean methylation and CpG 4 site methylation lower in DLB, SNCA126 isoform increased in DLB, total SNCA mRNA expression not changed                      | leukocytes       | DLB vs controls (20 cases, 20 controls)  | Funahashi et al. 2017 <sup>11</sup>   |

**Supplementary Material:  
hPSC models of SNCA regulation**

| Location/genomic regions                    | Method                                                                                    | % methylation                                                                 | Cell type/tissue | PD                                                  | Reference                           |
|---------------------------------------------|-------------------------------------------------------------------------------------------|-------------------------------------------------------------------------------|------------------|-----------------------------------------------------|-------------------------------------|
| SNCA intron 1, PARK2 promoter               | Methylation-specific PCR, ratio of methylated/unmethylated band intensity by densitometry | Methylation lower in PD for SNCA and PARK2 regions                            | blood            | EOPD PD vs controls (91 cases, 52 controls)         | Eryilmaz et al. 2017 <sup>12</sup>  |
| <b>SNP associated with SNCA methylation</b> |                                                                                           |                                                                               |                  |                                                     |                                     |
| Rep-1, SNCA intron 1                        | Bisulfite sequencing of 451bp fragment, 10 clones                                         | Shorter allele associated with higher methylation, mRNA levels not different  | PBMC             | PD vs controls (100 cases, 95 controls)             | Ai et al. 2014 <sup>13</sup>        |
| rs3756063, SNCA intron 1                    | Bisulfite sequencing of 451bp fragment, 10 clones                                         | Decreased methylation with risk allele, mRNA levels not different             | blood            | PD vs controls (91 cases, 92 controls), Chinese Han | Wei et al. 2016 <sup>14</sup>       |
| rs3756063 (CpG19), SNCA intron 1            | Bisulfite treatment with pyrosequencing (14 CpGs)                                         | Hypomethylation in PD, men; decreased methylation with risk allele (G-allele) | blood            | PD vs controls (490 cases, 485 controls)            | Schmitt et al. 2015 <sup>15</sup>   |
| rs3756063, SNCA intron 1                    | Methylation-sensitive RE digest with qPCR                                                 | Decrease of methylation with risk allele                                      | blood            | PD vs controls (36 cases, 36 controls)              | Pihlstrom et al. 2015 <sup>16</sup> |
| rs3756063, SNCA intron 1                    | Methylation-sensitive RE digest with qPCR                                                 | Decrease of methylation with risk allele                                      | cortex           | PD, controls pooled (12 cases, 12 controls)         | Pihlstrom et al. 2015 <sup>16</sup> |

**References to Supplementary Table 3:**

- 1 Jowaed, A., Schmitt, I., Kaut, O. & Wullner, U. Methylation regulates alpha-synuclein expression and is decreased in Parkinson's disease patients' brains. *The Journal of neuroscience : the official journal of the Society for Neuroscience* **30**, 6355-6359, doi:10.1523/JNEUROSCI.6119-09.2010 (2010).
- 2 Matsumoto, L. *et al.* CpG demethylation enhances alpha-synuclein expression and affects the pathogenesis of Parkinson's disease. *PloS one* **5**, e15522, doi:10.1371/journal.pone.0015522 (2010).
- 3 Desplats, P. *et al.* Alpha-synuclein sequesters Dnmt1 from the nucleus: a novel mechanism for epigenetic alterations in Lewy body diseases. *The Journal of biological chemistry* **286**, 9031-9037, doi:10.1074/jbc.C110.212589 (2011).

- 4 de Boni, L. *et al.* Next-generation sequencing reveals regional differences of the alpha-synuclein methylation state independent of Lewy body disease. *Neuromolecular Med* **13**, 310-320, doi:10.1007/s12017-011-8163-9 (2011).
- 5 de Boni, L. *et al.* DNA methylation levels of alpha-synuclein intron 1 in the aging brain. *Neurobiology of aging* **36**, 3334 e3337-3334 e3311, doi:10.1016/j.neurobiolaging.2015.08.028 (2015).
- 6 Guhathakurta, S., Evangelista, B. A., Ghosh, S., Basu, S. & Kim, Y. S. Hypomethylation of intron1 of alpha-synuclein gene does not correlate with Parkinson's disease. *Molecular brain* **10**, 6, doi:10.1186/s13041-017-0285-z (2017).
- 7 Masliah, E., Dumaop, W., Galasko, D. & Desplats, P. Distinctive patterns of DNA methylation associated with Parkinson disease: identification of concordant epigenetic changes in brain and peripheral blood leukocytes. *Epigenetics* **8**, 1030-1038, doi:10.4161/epi.25865 (2013).
- 8 Stoger, R., Scaife, P. J., Shephard, F. & Chakrabarti, L. Elevated 5hmC levels characterize DNA of the cerebellum in Parkinson's disease. *NPJ Parkinsons Dis* **3**, 6, doi:10.1038/s41531-017-0007-3 (2017).
- 9 Tan, Y. Y. *et al.* Methylation of alpha-synuclein and leucine-rich repeat kinase 2 in leukocyte DNA of Parkinson's disease patients. *Parkinsonism & related disorders* **20**, 308-313, doi:10.1016/j.parkreldis.2013.12.002 (2014).
- 10 Song, Y. *et al.* Pyrosequencing analysis of SNCA methylation levels in leukocytes from Parkinson's disease patients. *Neuroscience letters* **569**, 85-88, doi:10.1016/j.neulet.2014.03.076 (2014).
- 11 Funahashi, Y. *et al.* DNA methylation changes at SNCA intron 1 in patients with dementia with Lewy bodies. *Psychiatry Clin Neurosci* **71**, 28-35, doi:10.1111/pcn.12462 (2017).
- 12 Eryilmaz, I. E. *et al.* Epigenetic approach to early-onset Parkinson's disease: low methylation status of SNCA and PARK2 promoter regions. *Neurological research* **39**, 965-972, doi:10.1080/01616412.2017.1368141 (2017).
- 13 Ai, S. X. *et al.* Hypomethylation of SNCA in blood of patients with sporadic Parkinson's disease. *Journal of the neurological sciences* **337**, 123-128, doi:10.1016/j.jns.2013.11.033 (2014).
- 14 Wei, Y. *et al.* The rs3756063 polymorphism is associated with SNCA methylation in the Chinese Han population. *Journal of the neurological sciences* **367**, 11-14, doi:10.1016/j.jns.2016.05.037 (2016).
- 15 Schmitt, I. *et al.* L-dopa increases alpha-synuclein DNA methylation in Parkinson's disease patients in vivo and in vitro. *Movement disorders : official journal of the Movement Disorder Society* **30**, 1794-1801, doi:10.1002/mds.26319 (2015).
- 16 Pihlstrom, L., Berge, V., Rengmark, A. & Toft, M. Parkinson's disease correlates with promoter methylation in the alpha-synuclein gene. *Movement disorders : official journal of the Movement Disorder Society* **30**, 577-580, doi:10.1002/mds.26073 (2015).

**Supplementary Table 4: Transcription factor binding in *SNCA* gene**

| <b>Transcription factor</b> | <b>Binding in <i>SNCA</i> genomic region</b>                                   | <b>Mechanism/Effect</b>                                                                                                                                                                                                                                                        | <b>Reference</b>                                                         |
|-----------------------------|--------------------------------------------------------------------------------|--------------------------------------------------------------------------------------------------------------------------------------------------------------------------------------------------------------------------------------------------------------------------------|--------------------------------------------------------------------------|
| PARP-1                      | Binding to Rep-1 allele                                                        | EMSA, CHIP showed specific binding of PARP-1 to Rep1. Inhibition of PARP-1's catalytic domain increased the endogenous <i>SNCA</i> mRNA levels in SH-SY5Y cells, PARP-1 binding to Rep1 reduced transcriptional activity of <i>SNCA</i> promoter/enhancer in luciferase assays | Chiba-Falek 2005 <sup>1</sup>                                            |
| C/EBPb                      | Multiple predicted binding sites                                               | Overexpression of C/EBP beta caused an increase in expression of alpha-synuclein                                                                                                                                                                                               | Gomez-Santos 2005 <sup>2</sup> , Brenner 2015 <sup>3</sup>               |
| GATA-2                      | GATA-1 occupies a highly restricted region within intron 1 of <i>SNCA</i> gene | Knockdown of GATA-2 in SH-SY5Y cells decrease alpha-synuclein expression by about 50%                                                                                                                                                                                          | Scherzer 2008 <sup>4</sup> , Brenner 2015 <sup>3</sup>                   |
| ZSCAN21                     | Binds to intron 1                                                              | Transcriptional activator of <i>SNCA</i>                                                                                                                                                                                                                                       | Clough 2009 <sup>5</sup> , 2011 <sup>6</sup> , Brenner 2015 <sup>3</sup> |
| ZNF219                      | Binds to 5' region                                                             | Complex regulation of <i>SNCA</i> gene                                                                                                                                                                                                                                         | Clough 2009 <sup>5</sup> , 2011 <sup>6</sup>                             |
| YY1                         | 3' region SNP rs356219-A binds to YY-1                                         | Alpha-synuclein expression unchanged, but antisense non-coding RNA RP11-115D19.1 is stimulated by YY1. Knockdown of RP11-115D19.1 increases alpha-synuclein expression                                                                                                         | Mizuta 2013 <sup>7</sup>                                                 |
| p53                         | p53 binding site "CATG" in murine <i>SNCA</i> promoter -970 to -967            | Feedback loop between alpha-synuclein and p53, depletion of p53 results in down-regulation of alpha-synuclein                                                                                                                                                                  | Douplan 2016 <sup>8</sup>                                                |

**References to Supplementary Table 4:**

- 1 Chiba-Falek, O., Kowalak, J. A., Smulson, M. E. & Nussbaum, R. L. Regulation of alpha-synuclein expression by poly (ADP ribose) polymerase-1 (PARP-1) binding to the NACP-Rep1 polymorphic site upstream of the SNCA gene. *American journal of human genetics* **76**, 478-492 (2005).
- 2 Gomez-Santos, C. *et al.* Induction of C/EBP beta and GADD153 expression by dopamine in human neuroblastoma cells. Relationship with alpha-synuclein increase and cell damage. *Brain research bulletin* **65**, 87-95, doi:10.1016/j.brainresbull.2004.11.008 (2005).
- 3 Brenner, S., Wersinger, C. & Gasser, T. Transcriptional regulation of the alpha-synuclein gene in human brain tissue. *Neuroscience letters* **599**, 140-145, doi:10.1016/j.neulet.2015.05.029 (2015).
- 4 Scherzer, C. R. *et al.* GATA transcription factors directly regulate the Parkinson's disease-linked gene alpha-synuclein. *Proceedings of the National Academy of Sciences of the United States of America* **105**, 10907-10912 (2008).
- 5 Clough, R. L., Dermentzaki, G. & Stefanis, L. Functional dissection of the alpha-synuclein promoter: transcriptional regulation by ZSCAN21 and ZNF219. *Journal of neurochemistry* **110**, 1479-1490, doi:10.1111/j.1471-4159.2009.06250.x (2009).
- 6 Clough, R. L., Dermentzaki, G., Haritou, M., Petsakou, A. & Stefanis, L. Regulation of alpha-synuclein expression in cultured cortical neurons. *Journal of neurochemistry* **117**, 275-285, doi:10.1111/j.1471-4159.2011.07199.x (2011).
- 7 Mizuta, I. *et al.* YY1 binds to alpha-synuclein 3'-flanking region SNP and stimulates antisense noncoding RNA expression. *Journal of human genetics* **58**, 711-719, doi:10.1038/jhg.2013.90 (2013).
- 8 Duplan, E., Giordano, C., Checler, F. & Alves da Costa, C. Direct alpha-synuclein promoter transactivation by the tumor suppressor p53. *Molecular neurodegeneration* **11**, 13, doi:10.1186/s13024-016-0079-2 (2016).

**Supplemental Table 5: Positions/coordinates for UCSC genome browser custom tracks**

**Figure 1A**

| Genome Browser Custom Tracks (GRCh37/hg19)                                     | References                                |
|--------------------------------------------------------------------------------|-------------------------------------------|
| <b>SNCA Triplications</b>                                                      |                                           |
| browser position chr4:89584300-90759447                                        |                                           |
| track name="SNCA Triplications" description="SNCA Triplications" color=255,0,0 |                                           |
| chr4 90033968 92523370 Olgiati                                                 | (Ross et al., 2008; Olgiati et al., 2015) |
| chr4 90165429 92523370 Ibanez                                                  | (Ibanez et al., 2004; Ross et al., 2008)  |
| chr4 90645250 92523370 Sekine                                                  | (Ross et al., 2008; Sekine et al., 2010)  |
| chr4 90645250 90759447 Keyser                                                  | (Ross et al., 2008; Keyser et al., 2010)  |
| chr4 90302002 91143727 Lister                                                  | (Fuchs et al., 2007; Ross et al., 2008)   |
|                                                                                |                                           |
| <b>SNCA Duplications</b>                                                       |                                           |
| browser position chr4:88343728-94751142                                        |                                           |
| track name="SNCA Duplications" description="SNCA Duplications" color=0,0,255   |                                           |
| chr4 88343728 94751142 Kara                                                    | (Kara et al., 2014)                       |
| chr4 88394488 91760188 FPD-321                                                 | (Ibanez et al., 2004)                     |
| chr4 90645250 92523370 FPD-410                                                 |                                           |
| chr4 90645250 90875780 Jap-A                                                   | (Nishioka et al., 2006)                   |
| chr4 90645250 90875780 Jap-B                                                   |                                           |
| chr4 90645250 90763144 FPD-437                                                 | (Ibanez et al., 2004)                     |
| chr4 90645250 92523370 Elia-A                                                  | (Elia et al., 2013)                       |
| chr4 87870821 91760188 Elia-B                                                  |                                           |
| chr4 86936276 92523370 FPD-131                                                 | (Ibanez et al., 2004)                     |
| chr4 88529681 94693649 Ikeuchi                                                 | (Ikeuchi et al., 2008)                    |
| chr4 90645250 90875780 Jap-E                                                   | (Nishioka et al., 2006)                   |
| chr4 89428083 90875780 Kojovic                                                 | (Kojovic et al., 2012)                    |

**Supplementary Material:  
hPSC models of SNCA regulation**

|                                                                                   |                                         |
|-----------------------------------------------------------------------------------|-----------------------------------------|
| chr4 88874976 92527977 Sironi                                                     | (Sironi et al., 2010)                   |
| chr4 90302002 91143727 Lister                                                     | (Fuchs et al., 2007; Ross et al., 2008) |
| <b>SNCA Trip/Dup</b>                                                              |                                         |
| browser position chr4:89322975-91310633                                           |                                         |
| track name="SNCA Dup/Trip" description="SNCA Duplication/Triplication" itemRgb=On |                                         |
| chr4 90013153 91310633 Italian-Dup 0 . 90013153 91310633 0,0,255                  | (Ferese et al., 2015)                   |
| chr4 90500031 90851296 Italian-Trip 0 . 90500031 90851296 255,0,0                 |                                         |
| chr4 89322975 91059278 Iowa-Dup 0 . 89322975 91059278 0,0,255                     | (Singleton et al., 2003)                |
| chr4 89337388 91047146 Iowa-Trip 0 . 89337388 91047146 255,0,0                    |                                         |
| <b>SNCA Deletions</b>                                                             |                                         |
| browser position chr4:85839771-98235479                                           |                                         |
| track name="SNCA Deletions" description="SNCA Deletions" color=0,160,0            |                                         |
| chr4 85839771 93071150 Deletion-2                                                 | (ClinVar 2018; Var.ID: 396146)          |
| chr4 89891197 98235479 Deletion-3                                                 | (ClinVar 2018; Var.ID: 443904)          |
| chr4 86370518 94894345 Deletion-4                                                 | (ClinVar 2018; Var.ID: 152923)          |
| chr4 90167781 91166787 nsv1012406                                                 | (Coe et al., 2014)                      |
| chr4 90168566 91165346 nsv1323206                                                 | (Duyzend et al., 2016)                  |
| chr4 90272120 91156917 nsv949454                                                  | (Vulto-van Silfhout et al., 2013)       |
| chr4 90458652 91213084 nsv529189                                                  | (Miller et al., 2010)                   |

**Figure 1B**

| Genome Browser Custom Tracks (GRCh37/hg19)               | References                |
|----------------------------------------------------------|---------------------------|
| <b>Small SSV and repeats</b>                             |                           |
| browser position chr4:90742421-90767305                  |                           |
| track name=Rep1-allele description=" " color=163,0,190   |                           |
| chr4 90767039 90767305 Rep1-allele                       | (Maraganore et al., 2006) |
| track name="CT-rich repeat" description=" "              |                           |
| chr4 90742421 90742492 CT-RichRepeat                     | (Lutz et al., 2015)       |
| track name="poly T-allele" description=" " color=0,160,0 |                           |

**Supplementary Material:  
hPSC models of SNCA regulation**

|                                                                 |                                                                                       |
|-----------------------------------------------------------------|---------------------------------------------------------------------------------------|
| chr4 90749444 90749566 PolyT-allele                             | (Beyer et al., 2007)                                                                  |
|                                                                 |                                                                                       |
| <b>SNPs from GWAS</b>                                           |                                                                                       |
| browser position chr4:90759047-90635020                         |                                                                                       |
| track name=SNPs description="SNPs" itemRgb=On                   |                                                                                       |
| chr4 90758945 90758945 rs2301134 0 . 90758945 90758945 0,0,0    | Reviewed in (Campelo and Silva, 2017)                                                 |
| chr4 90759047 90759047 rs2619363 0 . 90759047 90759047 0,0,0    |                                                                                       |
| chr4 90759887 90759887 rs2619364 0 . 90759887 90759887 0,0,0    |                                                                                       |
| chr4 90760828 90760828 rs2583988 0 . 90760828 90760828 0,0,0    |                                                                                       |
| chr4 90678798 90678798 rs2572324 0 . 90678798 90678798 0,0,0    |                                                                                       |
| chr4 90721637 90721637 rs2583959 0 . 90721637 90721637 0,0,0    | (Fuchs et al., 2008)                                                                  |
| chr4 90678541 90678541 rs2736990 0 . 90678541 90678541 0,160,0  | (McCarthy et al., 2011)                                                               |
| chr4 90711770 90711770 rs2737029 0 . 90711770 90711770 0,0,0    | Reviewed in (Campelo and Silva, 2017)                                                 |
| chr4 90674431 90674431 rs356168 0 . 90674431 90674431 240,0,0   | (Rhinn et al., 2012; Soldner et al., 2016; Glenn et al., 2017)                        |
| chr4 90666041 90666041 rs356203 0 . 90666041 90666041 0,0,0     | Reviewed in (Campelo and Silva, 2017)                                                 |
| chr4 90675238 90675238 rs3857059 0 . 90675238 90675238 0,0,0    |                                                                                       |
| chr4 90655003 90655003 rs7684318 0 . 90655003 90655003 0,0,0    |                                                                                       |
| chr4 90734535 90734535 rs894278 0 . 90734535 90734535 0,0,0     |                                                                                       |
| chr4 90757505 90757505 rs1372520 0 . 90757505 90757505 0,0,0    |                                                                                       |
| chr4 90657491 90657491 rs3775423 0 . 90657491 90657491 0,0,0    |                                                                                       |
| chr4 90642464 90642464 rs356221 0 . 90642464 90642464 0,0,0     |                                                                                       |
| chr4 90646886 90646886 rs356165 0 . 90646886 90646886 163,0,190 | (Linnertz et al., 2009; McCarthy et al., 2011; Cardo et al., 2014)                    |
| chr4 90637010 90637010 rs356218 0 . 90637010 90637010 0,0,0     | Reviewed in (Campelo and Silva, 2017)                                                 |
| chr4 90637601 90637601 rs356219 0 . 90637601 90637601 163,0,190 | (Fuchs et al., 2008; Linnertz et al., 2009; Mata et al., 2010; McCarthy et al., 2011) |
| chr4 90641340 90641340 rs356220 0 . 90641340 90641340 0,0,0     |                                                                                       |



**Supplementary Material:  
hPSC models of SNCA regulation**

|                                                                    |                                                  |
|--------------------------------------------------------------------|--------------------------------------------------|
| chr4 90635020 90635020 rs181489 0 . 90635020 90635020 0,0,0        | Reviewed in (Campelo and Silva, 2017)            |
| chr4 90639515 90639515 rs11931074 0 . 90639515 90639515 240,0,0    | (Hu et al., 2012; Cardo et al., 2014)            |
| chr4 90757394 90757394 rs3756063 0 . 90757394 90757394 0,0,255     | (Pihlstrom et al., 2015; Wei et al., 2016)       |
| chr4 90647278 90647278 rs17016074 0 . 90647278 90647278 240,0,0    | (Westerlund et al., 2008; Sotiriou et al., 2009) |
| chr4 90647640 90647640 rs10024743 0 . 90647640 90647640 0,0,0      | Reviewed in (Campelo and Silva, 2017)            |
| chr4 90705364 90705364 rs356186 0 . 90705364 90705364 0,0,0        |                                                  |
| <b>miRNA Binding Sites in SNCA 3'UTR</b>                           |                                                  |
| browser position chr4:90647024-90647653                            |                                                  |
| track name="miRNA Binding Sites" description="miRNA Binding Sites" |                                                  |
| chr4 90647314 90647320 miR-153-3p                                  | (Doxakis, 2010)                                  |
| chr4 90647653 90647659 miR-7-5p                                    |                                                  |
| chr4 90647550 90647556 miR-140-3p                                  | (Tagliafierro et al., 2017)                      |
| chr4 90647133 90647140 miR-223-3p                                  |                                                  |
| chr4 90647640 90647646 miR-34b-3p                                  | (Kabaria et al., 2015)                           |
| chr4 90647018 90647024 miR-34c-5p                                  |                                                  |
| <b>Evolutionary conserved regions in SNCA gene</b>                 |                                                  |
| browser position chr4:90614642-90791735                            |                                                  |
| track name="ECR Regions" description="ECR Regions"                 |                                                  |
| chr4 90614642 90614787 D1                                          | (Sterling et al., 2014)                          |
| chr4 90614642 90614787 D2                                          |                                                  |
| chr4 90629790 90630480 D3                                          |                                                  |
| chr4 90636848 90637316 D6                                          |                                                  |
| chr4 90659197 90659350 I2                                          |                                                  |
| chr4 90674661 90675121 I5                                          |                                                  |
| chr4 90675762 90675891 I6                                          |                                                  |
| chr4 90682267 90682378 I8                                          |                                                  |

**Supplementary Material:  
hPSC models of SNCA regulation**

|                                                              |                                               |
|--------------------------------------------------------------|-----------------------------------------------|
| chr4 90721509 90721763 I12                                   |                                               |
| chr4 90785647 90785975 U3                                    |                                               |
| chr4 90789074 90789786 U4-1                                  |                                               |
| chr4 90791038 90791735 U4-3                                  |                                               |
|                                                              |                                               |
| <b>CpG Islands of SNCA gene</b>                              |                                               |
| browser position chr4:90757302-90758870                      |                                               |
| track name="CpG Islands" description="CpG Islands"           |                                               |
| chr4 90758009 90758870 Promoter                              | (Pihlstrom et al., 2015)                      |
| chr4 90757302 90757745 Intron-1                              | (Eryilmaz et al., 2017)                       |
|                                                              |                                               |
| <b>TF Binding Sites within SNCA gene</b>                     |                                               |
| browser position chr4:90749639-90758212                      |                                               |
| track name="TF Binding Sites" description="TF Binding Sites" |                                               |
| chr4 90758190 90758212 ZSCAN21                               | (Clough et al., 2009; Brenner et al., 2015)   |
| chr4 90749639 90749651 GATA2                                 | (Scherzer et al., 2008; Brenner et al., 2015) |
| chr4 90674423 90674438 EMX2/NKX6-1                           | (Soldner et al., 2016)                        |

**References to Supplementary Table 5:**

- Beyer, K., Humbert, J., Ferrer, A., Lao, J.I., Latorre, P., Lopez, D., et al. (2007). A variable poly-T sequence modulates alpha-synuclein isoform expression and is associated with aging. *J Neurosci Res* 85(7), 1538-1546. doi: 10.1002/jnr.21270.
- Brenner, S., Wersinger, C., and Gasser, T. (2015). Transcriptional regulation of the alpha-synuclein gene in human brain tissue. *Neurosci Lett* 599, 140-145. doi: 10.1016/j.neulet.2015.05.029.
- Campelo, C., and Silva, R.H. (2017). Genetic Variants in SNCA and the Risk of Sporadic Parkinson's Disease and Clinical Outcomes: A Review. *Parkinsons Dis* 2017, 4318416. doi: 10.1155/2017/4318416.

**Supplementary Material:  
hPSC models of SNCA regulation**

- Cardo, L.F., Coto, E., de Mena, L., Ribacoba, R., Mata, I.F., Menendez, M., et al. (2014). Alpha-synuclein transcript isoforms in three different brain regions from Parkinson's disease and healthy subjects in relation to the SNCA rs356165/rs11931074 polymorphisms. *Neurosci Lett* 562, 45-49. doi: 10.1016/j.neulet.2014.01.009.
- ClinVar. Bethesda (MD): National Library of Medicine (US), National Center for Biotechnology Information. Variation ID 396146, Allele ID 383039. Retrieved March 07, 2018, from <https://www.ncbi.nlm.nih.gov/clinvar/variation/396146/>
- ClinVar. Bethesda (MD): National Library of Medicine (US), National Center for Biotechnology Information. Variation ID 443904, Allele ID 437566. Retrieved March 07, 2018, from <https://www.ncbi.nlm.nih.gov/clinvar/variation/443904/>
- ClinVar. Bethesda (MD): National Library of Medicine (US), National Center for Biotechnology Information. Variation ID 152923, Allele ID 162674. Retrieved March 07, 2018, from <https://www.ncbi.nlm.nih.gov/clinvar/variation/152923/#supporting-observations>
- Clough, R.L., Dermentzaki, G., and Stefanis, L. (2009). Functional dissection of the alpha-synuclein promoter: transcriptional regulation by ZSCAN21 and ZNF219. *J Neurochem* 110(5), 1479-1490. doi: 10.1111/j.1471-4159.2009.06250.x.
- Coe, B.P., Witherspoon, K., Rosenfeld, J.A., van Bon, B.W., Vulto-van Silfhout, A.T., Bosco, P., et al. (2014). Refining analyses of copy number variation identifies specific genes associated with developmental delay. *Nat Genet* 46(10), 1063-1071. doi: 10.1038/ng.3092.
- Doxakis, E. (2010). Post-transcriptional regulation of alpha-synuclein expression by mir-7 and mir-153. *J Biol Chem* 285(17), 12726-12734. doi: 10.1074/jbc.M109.086827.
- Duyzend, M.H., Nuttle, X., Coe, B.P., Baker, C., Nickerson, D.A., Bernier, R., et al. (2016). Maternal Modifiers and Parent-of-Origin Bias of the Autism-Associated 16p11.2 CNV. *Am J Hum Genet* 98(1), 45-57. doi: 10.1016/j.ajhg.2015.11.017.
- Elia, A.E., Petrucci, S., Fasano, A., Guidi, M., Valbonesi, S., Bernardini, L., et al. (2013). Alpha-synuclein gene duplication: marked intrafamilial variability in two novel pedigrees. *Mov Disord* 28(6), 813-817. doi: 10.1002/mds.25518.
- Eryilmaz, I.E., Cecener, G., Erer, S., Egeli, U., Tunca, B., Zarifoglu, M., et al. (2017). Epigenetic approach to early-onset Parkinson's disease: low methylation status of SNCA and PARK2 promoter regions. *Neurol Res* 39(11), 965-972. doi: 10.1080/01616412.2017.1368141.
- Ferese, R., Modugno, N., Campopiano, R., Santilli, M., Zampatti, S., Giardina, E., et al. (2015). Four Copies of SNCA Responsible for Autosomal Dominant Parkinson's Disease in Two Italian Siblings. *Parkinsons Dis* 2015, 546462. doi: 10.1155/2015/546462.
- Fuchs, J., Nilsson, C., Kachergus, J., Munz, M., Larsson, E.M., Schüle, B., et al. (2007). Phenotypic variation in a large Swedish pedigree due to SNCA duplication and triplication. *Neurology* 68(12), 916-922.
- Fuchs, J., Tichopad, A., Golub, Y., Munz, M., Schweitzer, K.J., Wolf, B., et al. (2008). Genetic variability in the SNCA gene influences alpha-synuclein levels in the blood and brain. *FASEB J* 22(5), 1327-1334. doi: 10.1096/fj.07-9348com.

**Supplementary Material:  
hPSC models of SNCA regulation**

- Glenn, O.C., Tagliafierro, L., Beach, T.G., Woltjer, R.L., and Chiba-Falek, O. (2017). Interpreting Gene Expression Effects of Disease-Associated Variants: A Lesson from SNCA rs356168. *Front Genet* 8, 133. doi: 10.3389/fgene.2017.00133.
- Hu, Y., Tang, B., Guo, J., Wu, X., Sun, Q., Shi, C., et al. (2012). Variant in the 3' region of SNCA associated with Parkinson's disease and serum alpha-synuclein levels. *J Neurol* 259(3), 497-504. doi: 10.1007/s00415-011-6209-4.
- Ibanez, P., Bonnet, A.M., Debarges, B., Lohmann, E., Tison, F., Pollak, P., et al. (2004). Causal relation between alpha-synuclein gene duplication and familial Parkinson's disease. *Lancet* 364(9440), 1169-1171.
- Ikeuchi, T., Kakita, A., Shiga, A., Kasuga, K., Kaneko, H., Tan, C.F., et al. (2008). Patients homozygous and heterozygous for SNCA duplication in a family with parkinsonism and dementia. *Arch Neurol* 65(4), 514-519. doi: 10.1001/archneur.65.4.514.
- Kabaria, S., Choi, D.C., Chaudhuri, A.D., Mouradian, M.M., and Junn, E. (2015). Inhibition of miR-34b and miR-34c enhances alpha-synuclein expression in Parkinson's disease. *FEBS Lett* 589(3), 319-325. doi: 10.1016/j.febslet.2014.12.014.
- Kara, E., Kiely, A.P., Proukakis, C., Giffin, N., Love, S., Hehir, J., et al. (2014). A 6.4 Mb Duplication of the alpha-Synuclein Locus Causing Frontotemporal Dementia and Parkinsonism: Phenotype-Genotype Correlations. *JAMA Neurol* 71(9), 1162-1171. doi: 10.1001/jamaneurol.2014.994.
- Keyser, R.J., Lombard, D., Veikondis, R., Carr, J., and Bardien, S. (2010). Analysis of exon dosage using MLPA in South African Parkinson's disease patients. *Neurogenetics* 11(3), 305-312. doi: 10.1007/s10048-009-0229-6.
- Kojovic, M., Sheerin, U.M., Rubio-Agusti, I., Saha, A., Bras, J., Gibbons, V., et al. (2012). Young-onset parkinsonism due to homozygous duplication of alpha-synuclein in a consanguineous family. *Mov Disord* 27(14), 1827-1829. doi: 10.1002/mds.25199.
- Linnertz, C., Saucier, L., Ge, D., Cronin, K.D., Burke, J.R., Browndyke, J.N., et al. (2009). Genetic regulation of alpha-synuclein mRNA expression in various human brain tissues. *PLoS One* 4(10), e7480.
- Lutz, M.W., Saul, R., Linnertz, C., Glenn, O.C., Roses, A.D., and Chiba-Falek, O. (2015). A cytosine-thymine (CT)-rich haplotype in intron 4 of SNCA confers risk for Lewy body pathology in Alzheimer's disease and affects SNCA expression. *Alzheimers Dement* 11(10), 1133-1143. doi: 10.1016/j.jalz.2015.05.011.
- Maraganore, D.M., de Andrade, M., Elbaz, A., Farrer, M.J., Ioannidis, J.P., Kruger, R., et al. (2006). Collaborative analysis of alpha-synuclein gene promoter variability and Parkinson disease. *Jama* 296(6), 661-670.
- Mata, I.F., Shi, M., Agarwal, P., Chung, K.A., Edwards, K.L., Factor, S.A., et al. (2010). SNCA variant associated with Parkinson disease and plasma alpha-synuclein level. *Arch Neurol* 67(11), 1350-1356. doi: 10.1001/archneurol.2010.279.
- McCarthy, J.J., Linnertz, C., Saucier, L., Burke, J.R., Hulette, C.M., Welsh-Bohmer, K.A., et al. (2011). The effect of SNCA 3' region on the levels of SNCA-112 splicing variant. *Neurogenetics* 12(1), 59-64. doi: 10.1007/s10048-010-0263-4.

**Supplementary Material:  
hPSC models of SNCA regulation**

- Miller, D.T., Adam, M.P., Aradhya, S., Biesecker, L.G., Brothman, A.R., Carter, N.P., et al. (2010). Consensus statement: chromosomal microarray is a first-tier clinical diagnostic test for individuals with developmental disabilities or congenital anomalies. *Am J Hum Genet* 86(5), 749-764. doi: 10.1016/j.ajhg.2010.04.006.
- Nishioka, K., Hayashi, S., Farrer, M.J., Singleton, A.B., Yoshino, H., Imai, H., et al. (2006). Clinical heterogeneity of alpha-synuclein gene duplication in Parkinson's disease. *Ann Neurol* 59(2), 298-309.
- Olgati, S., Thomas, A., Quadri, M., Breedveld, G.J., Graafland, J., Eussen, H., et al. (2015). Early-onset parkinsonism caused by alpha-synuclein gene triplication: Clinical and genetic findings in a novel family. *Parkinsonism Relat Disord* 21(8), 981-986. doi: 10.1016/j.parkreldis.2015.06.005.
- Pihlstrom, L., Berge, V., Rengmark, A., and Toft, M. (2015). Parkinson's disease correlates with promoter methylation in the alpha-synuclein gene. *Mov Disord* 30(4), 577-580. doi: 10.1002/mds.26073.
- Rhinn, H., Qiang, L., Yamashita, T., Rhee, D., Zolin, A., Vanti, W., et al. (2012). Alternative alpha-synuclein transcript usage as a convergent mechanism in Parkinson's disease pathology. *Nat Commun* 3, 1084. doi: 10.1038/ncomms2032.
- Ross, O.A., Braithwaite, A.T., Skipper, L.M., Kachergus, J., Hulihan, M.M., Middleton, F.A., et al. (2008). Genomic investigation of alpha-synuclein multiplication and parkinsonism. *Ann Neurol* 63(6), 743-750. doi: 10.1002/ana.21380.
- Scherzer, C.R., Grass, J.A., Liao, Z., Pepivani, I., Zheng, B., Eklund, A.C., et al. (2008). GATA transcription factors directly regulate the Parkinson's disease-linked gene alpha-synuclein. *Proc Natl Acad Sci U S A* 105(31), 10907-10912.
- Sekine, T., Kagaya, H., Funayama, M., Li, Y., Yoshino, H., Tomiyama, H., et al. (2010). Clinical course of the first Asian family with Parkinsonism related to SNCA triplication. *Mov Disord* 25(16), 2871-2875. doi: 10.1002/mds.23313.
- Singleton, A.B., Farrer, M., Johnson, J., Singleton, A., Hague, S., Kachergus, J., et al. (2003). alpha-Synuclein locus triplication causes Parkinson's disease. *Science* 302(5646), 841.
- Sironi, F., Trotta, L., Antonini, A., Zini, M., Ciccone, R., Della Mina, E., et al. (2010). alpha-Synuclein multiplication analysis in Italian familial Parkinson disease. *Parkinsonism Relat Disord* 16(3), 228-231. doi: 10.1016/j.parkreldis.2009.09.008.
- Soldner, F., Stelzer, Y., Shivalila, C.S., Abraham, B.J., Latourelle, J.C., Barrasa, M.I., et al. (2016). Parkinson-associated risk variant in distal enhancer of alpha-synuclein modulates target gene expression. *Nature* 533(7601), 95-99. doi: 10.1038/nature17939.
- Sotiriou, S., Gibney, G., Baxevanis, A.D., and Nussbaum, R.L. (2009). A single nucleotide polymorphism in the 3'UTR of the SNCA gene encoding alpha-synuclein is a new potential susceptibility locus for Parkinson disease. *Neurosci Lett* 461(2), 196-201. doi: 10.1016/j.neulet.2009.06.034.

**Supplementary Material:  
hPSC models of SNCA regulation**

- Sterling, L., Walter, M., Ting, D., and Schüle, B. (2014). Discovery of functional non-coding conserved regions in the alpha-synuclein gene locus. *F1000Res* 3(3), 259. doi: 10.12688/f1000research.3281.2.
- Tagliafierro, L., Glenn, O.C., Zamora, M.E., Beach, T.G., Woltjer, R.L., Lutz, M.W., et al. (2017). Genetic analysis of alpha-synuclein 3' untranslated region and its corresponding microRNAs in relation to Parkinson's disease compared to dementia with Lewy bodies. *Alzheimers Dement* 13(11), 1237-1250. doi: 10.1016/j.jalz.2017.03.001.
- Vulto-van Silfhout, A.T., Hehir-Kwa, J.Y., van Bon, B.W., Schuurs-Hoeijmakers, J.H., Meader, S., Hellebrekers, C.J., et al. (2013). Clinical significance of de novo and inherited copy-number variation. *Hum Mutat* 34(12), 1679-1687. doi: 10.1002/humu.22442.
- Wei, Y., Yang, N., Xu, Q., Sun, Q., Guo, J., Li, K., et al. (2016). The rs3756063 polymorphism is associated with SNCA methylation in the Chinese Han population. *J Neurol Sci* 367, 11-14. doi: 10.1016/j.jns.2016.05.037.
- Westerlund, M., Belin, A.C., Anvret, A., Hakansson, A., Nissbrandt, H., Lind, C., et al. (2008). Cerebellar alpha-synuclein levels are decreased in Parkinson's disease and do not correlate with SNCA polymorphisms associated with disease in a Swedish material. *FASEB J* 22(10), 3509-3514. doi: 10.1096/fj.08-110148.
